# Supplementary material for: Factors Associated with Symptom Stabilization that Allow for Successful Transition from Once-Monthly Paliperidone Palmitate to Three-Monthly Paliperidone Palmitate: A Post Hoc Analysis Examined Clinical Characteristics in Chinese Patients with Schizophrenia
Source: Springer Nature journal article supplement (doi:10.1007/s40263-023-01056-x), 2024-01-01
Supplement: MOESM1 [file 26606356]

Article title: Factors related to successful transition from once-monthly paliperidone palmitate to 3-monthly paliperidone palmitate: A post-hoc analysis examined clinical characteristics in Chinese patients with schizophrenia

Journal name: CNS Drugs

Author names: Xin Li, Chong Ye, Wanyi Zhang, Miaomiao Jia, Gang Wang

Corresponding author information:

Name: Gang Wang

Affiliation: The National Clinical Research Center for Mental Disorders& Beijing Key Laboratory of Mental Disorders, Beijing Anding Hospital, Capital Medical University, Xicheng District, Beijing

Email: gangwangdocvip@163.com

Table S1 Institution list of ethical committee or institutional review board

| <b>Institution Name</b>                                     | <b>Institution Address</b>                       | <b>Institution City State Zip</b> | <b>Country</b> | <b>Ethics approval number</b>       |
|-------------------------------------------------------------|--------------------------------------------------|-----------------------------------|----------------|-------------------------------------|
| Beijing Anding Hospital, Capital Medical University         | No.5, Ankang Hutong, Xicheng District            | Beijing, 100088                   | China          | (2012) Ethical Review No. (12)      |
| Peking University Six Hospital                              | No. 51, Huayuan North Road, Haidian District     | Beijing, 100083                   | China          | (2012) Ethical Review No. (30) -1   |
| Shanghai Mental Health Center                               | No.600, Wanping South Road, Xuhui District       | Shanghai, 200032                  | China          | 2012-47                             |
| Guangzhou Brain Hospital                                    | No.36, Mingxin Road, Liwan District              | Guangzhou, Guangdong, 510370      | China          | 2012 No. (58)                       |
| The Third Affiliated Hospital of Sun Yat-sen University     | No.600, Tianhe Road, Tianhe District             | Guangzhou, Guangdong, 510620      | China          | Medical Ethical [2012] NO. 1-23     |
| The First Affiliated Hospital of Kunshan Medical University | No.295, Xichang Road                             | Kunming, Yunnan, 650032           | China          | 2012 Ethical Review YL No. 9-1      |
| Renmin Hospital of Wuhan University                         | No.238, Jiefang Road, Wuchang District           | Wuhan, Hubei, 430060              | China          | 2012 Ethical Review No. (041)       |
| Beijing Huilongguan Hospital                                | No.7, Huilongguan South Road, Changping District | Beijing, 100096                   | China          | 2012 Ethical Review [Drug] No. (15) |
| The Second People's Hospital, Hunan Province                | No.427, Section 3, Furong Middle Road            | Changsha, Hunan, 410007           | China          | 2012 Ethical Review [Drug] No. (13) |
| Xi'an Mental Health Center                                  | No.15, Yanyin Road, Yanta District               | Xi'an, Shaanxi, 710061            | China          | 2012 Ethical Review No. (13)        |
| The First Affiliated of Fourth                              | No.127, Changlexi Road,                          | Xi'an, Shaanxi, 710032            | China          | (2012) Ethical Review No. (12)      |

|                                                                          |                                   |                              |       |                                     |
|--------------------------------------------------------------------------|-----------------------------------|------------------------------|-------|-------------------------------------|
| Military Medical University                                              | Xincheng District                 |                              |       |                                     |
| Tianjin Anding Hospital                                                  | No.13, Liulin Road, Hexi District | Tianjin, 300222              | China | 2012 Ethical Review No. (2012-09)   |
| The Second Affiliated Hospital of Zhejiang University School of Medicine | No.88, Jiefang Road               | Hangzhou, Zhejiang, 310009   | China | (2012) Ethical Review Drug No. (26) |
| The Institution of the Mental Health Center of Hebei Province            | No.572, Dongfeng East Road        | Baoding, Hebei, 071051       | China | Ethical Review No. 201211           |
| Guangdong Provincial People's Hospital                                   | No.106 Zhongshan Er Road          | Guangzhou, Guangdong, 510080 | China | Ethical Review [2012] No. 33-1      |

Table S2 Logistic regression model of Univariate analysis and Multivariate analysis

| Factor in logistic regression model                        | Univariate analysis |         | Multivariate analysis<br>(Include factor of P<0.1) |         | Multivariate analysis<br>(Backward method without PANSS<br>reduction on Week 5) <sup>1</sup> |         |
|------------------------------------------------------------|---------------------|---------|----------------------------------------------------|---------|----------------------------------------------------------------------------------------------|---------|
|                                                            | OR (95% CI)         | p-value | OR (95% CI)                                        | p-value | OR (95% CI)                                                                                  | p-value |
| Age                                                        | 0.99 (0.97 -1.02)   | 0.552   | -                                                  | -       | -                                                                                            | -       |
| Sex                                                        | 1.45 (0.87-2.42)    | 0.158   | -                                                  | -       | -                                                                                            | -       |
| Total PANSS                                                | 0.97 (0.95-0.99)    | 0.008   | 0.94 (0.90-1.00)                                   | 0.038   | 0.96 (0.92-1.01)                                                                             | 0.101   |
| CGI                                                        | 0.52 (0.36 -0.76)   | 0.001   | 0.21 (0.08-0.54)                                   | 0.001   | 0.22 (0.09 -0.51)                                                                            | <0.001  |
| Total PSP Score                                            | 1.02 (1.00 -1.04)   | 0.016   | 1.00 (0.96-1.04)                                   | 0.943   | -                                                                                            | -       |
| Count of antipsychotics categories taken before enrollment | 0.90 (0.75 -1.08)   | 0.266   | -                                                  | -       | -                                                                                            | -       |
| 0                                                          | Ref                 | -       |                                                    |         |                                                                                              |         |
| 1                                                          | 0.91 (0.48-1.72)    | 0.774   | -                                                  | -       | -                                                                                            | -       |
| ≥2                                                         | 0.73 (0.38 -1.42)   | 0.358   | -                                                  | -       | -                                                                                            | -       |
| Took clozapine before enrollment                           | 0.61 (0.10 -3.17)   | 0.590   | -                                                  | -       | -                                                                                            | -       |
| Dose of last single injection before randomization         |                     |         |                                                    |         |                                                                                              |         |
| ≤75                                                        | 2.79 (0.59-13.2)    | 0.196   | 0.59 (0.08-4.24)                                   | 0.602   | -                                                                                            | -       |
| 100                                                        | 1.89 (1.12 -3.19)   | 0.017   | 1.92 (0.85-4.36)                                   | 0.119   | -                                                                                            | -       |
| 150                                                        | Ref                 | -       | Ref                                                | -       | -                                                                                            | -       |
| Reduction of PANSS score on week 1                         | 1.04 (1.00 -1.08)   | 0.031   | 1.01 (0.94-1.08)                                   | 0.856   | -                                                                                            | -       |
| Reduction of PANSS score on week 5                         | 1.08 (1.05 -1.10)   | <0.001  | 0.88 (0.81, 0.96)                                  | 0.004   | -                                                                                            | -       |
| Reduction of PANSS score on week 13                        | 1.12 (1.09 -1.15)   | <0.001  | 1.20 (1.11 -1.29)                                  | <0.001  | 1.11 (1.06, 1.17)                                                                            | <0.001  |
| Reduction of CGI-S score on week 5                         | 2.21 (1.53 -3.20)   | <0.001  | 1.04 (0.39 -2.77)                                  | 0.934   | -                                                                                            | -       |
| Reduction of CGI-S score on week 13                        | 4.74 (3.10 -7.26)   | <0.001  | 2.65 (1.01 -6.96)                                  | 0.047   | 2.27 (1.03 -5.02)                                                                            | 0.043   |

<sup>1</sup>PANSS score reduction on week 5 was removed since the VIF is greater than 5, which means collinearity

*CGI-S* Clinical Global Impression-Severity, *CI* confidence interval, *OR* odds ratio, *PANSS* Positive and Negative Syndrome Scale, *PSP* Personal and Social Performance, *Ref* reference, *VIF* variance inflation factor

---
